# Supplementary material for: Metal acetate based synthesis of small-sized Cu2ZnSnS4 nanocrystals: effect of injection temperature and synthesis time
Source: Royal Society of Chemistry journal article supplement (doi:10.1039/c6ra28588k), 2017-01-01
Supplement: c6ra28588k1.pdf [file c6ra28588k1.pdf]

## Supplementary Information

### Metal acetates based synthesis of small-sized $\text{Cu}_2\text{ZnSnS}_4$ nanocrystals: Effect of injection temperature and synthesis time

A. Irkhina,<sup>a</sup> S. Levchenko,<sup>a</sup> V. Hinrichs,<sup>a</sup> P. Plate,<sup>a</sup> and T. Unold<sup>a</sup>

Tab. S1. Reaction conditions.

| $T_{\text{inj}}$ , °C         | Solvent/ligand, ml                   | Cu/Sn | Zn/Sn | Growth time |
|-------------------------------|--------------------------------------|-------|-------|-------------|
| 190                           | Oleylamine, 10 ml                    | 1.76  | 1.05  | 40          |
| 200                           | Oleylamine, 10 ml                    | 1.76  | 1.05  | 40          |
| 225                           | Oleylamine, 10 ml                    | 1.76  | 1.05  | 40          |
| 250                           | Oleylamine, 10 ml                    | 1.76  | 1.05  | 40          |
| 275                           | Oleylamine, 10 ml                    | 1.76  | 1.05  | 40          |
| 300                           | Oleylamine, 10 ml                    | 1.76  | 1.05  | 40          |
| <i>Additional experiments</i> |                                      |       |       |             |
| $T_{\text{inj}}$ , °C         | Solvent/ligand, ml                   | Cu/Sn | Zn/Sn | Growth time |
| 200                           | Oleylamine, 5 ml<br>Octadecene, 5 ml | 1.76  | 1.05  | 40          |
| 225                           | Oleylamine, 10 ml                    | 1.76  | 1.2   | 40          |
| 250                           | Oleylamine, 10 ml                    | 1.76  | 1.2   | 40          |

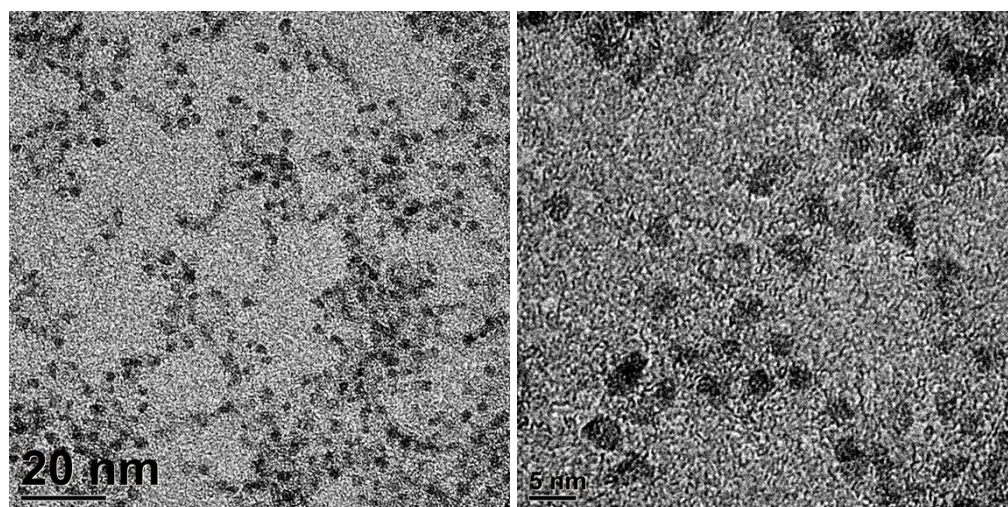

Fig. S1. TEM images of CZTS nanocrystals obtained with lower amount of oleylamine (oleylamine/octadecene mixture 1:1).

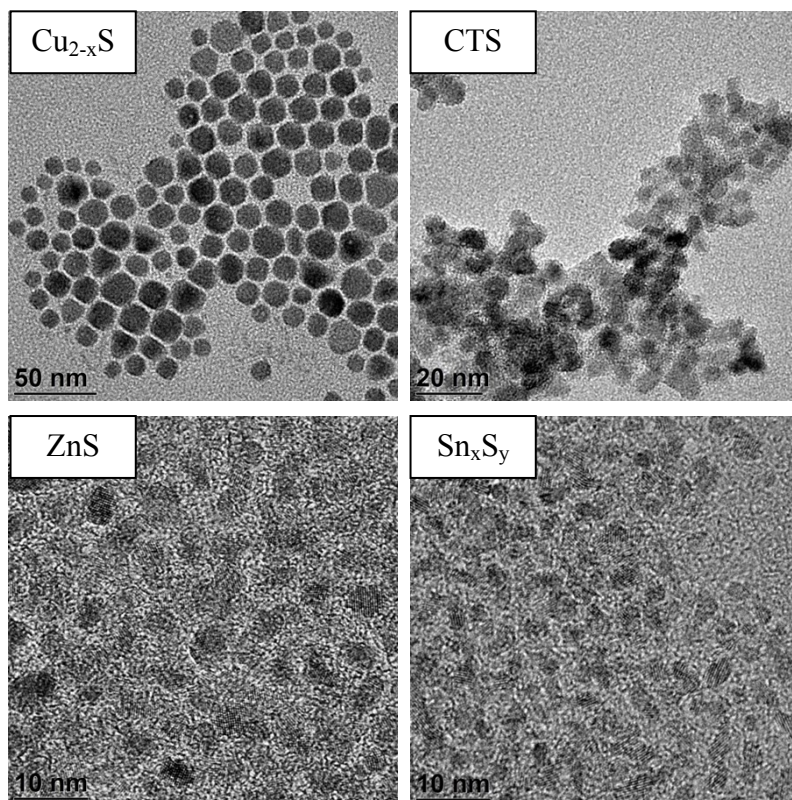

Fig. S2. TEM images of  $\text{Cu}_{2-x}\text{S}$ , CTS, ZnS and  $\text{Sn}_x\text{S}_y$  nanocrystals obtained with same reaction conditions as CZTS nanoparticles.

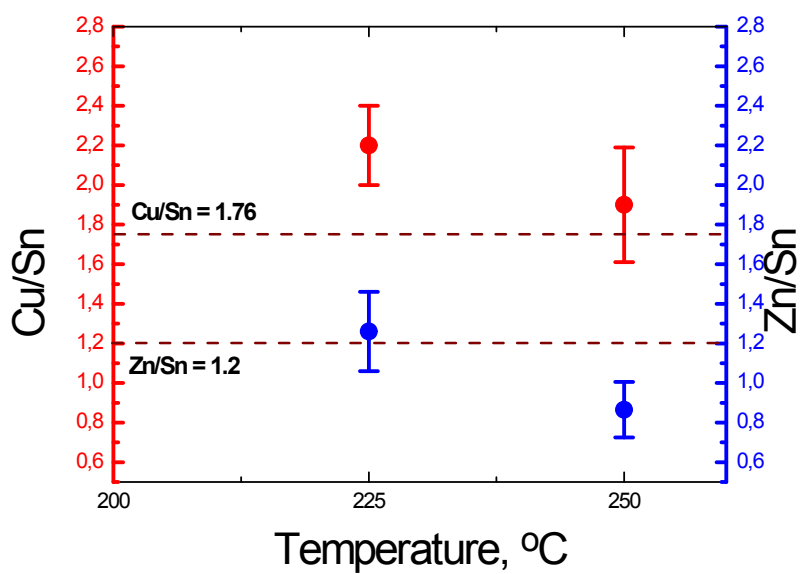

Fig. S3. Temperature dependence of Cu/Sn and Zn/Sn ratios of obtained nanoparticles synthesized with weight-in ratio of Zn/Sn=1.2 according to LA-ICP-MS analysis.

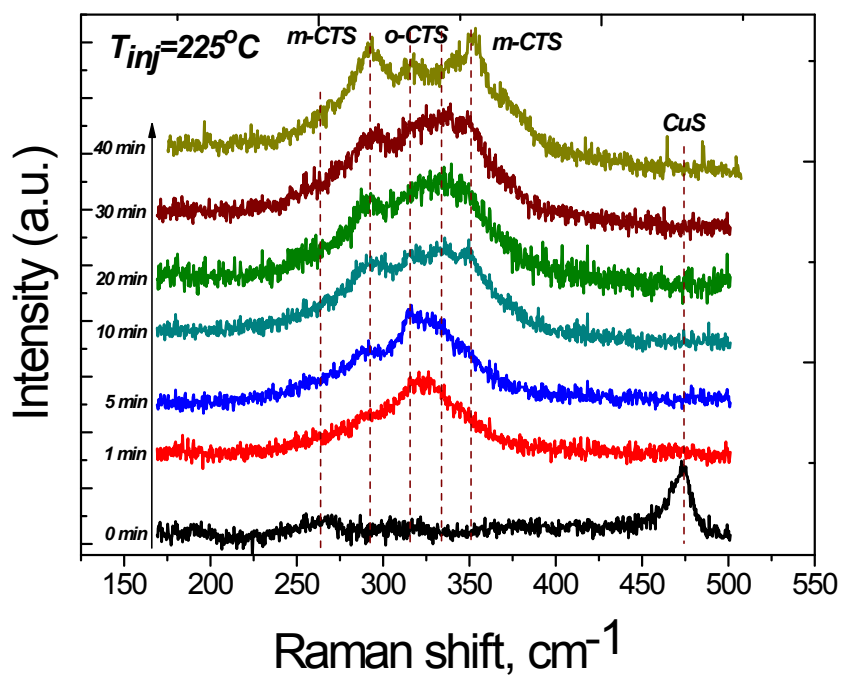

Fig. S4. Evolution of Raman signal of CTS nanoparticles with increasing of the growth time at  $225^\circ\text{C}$ .

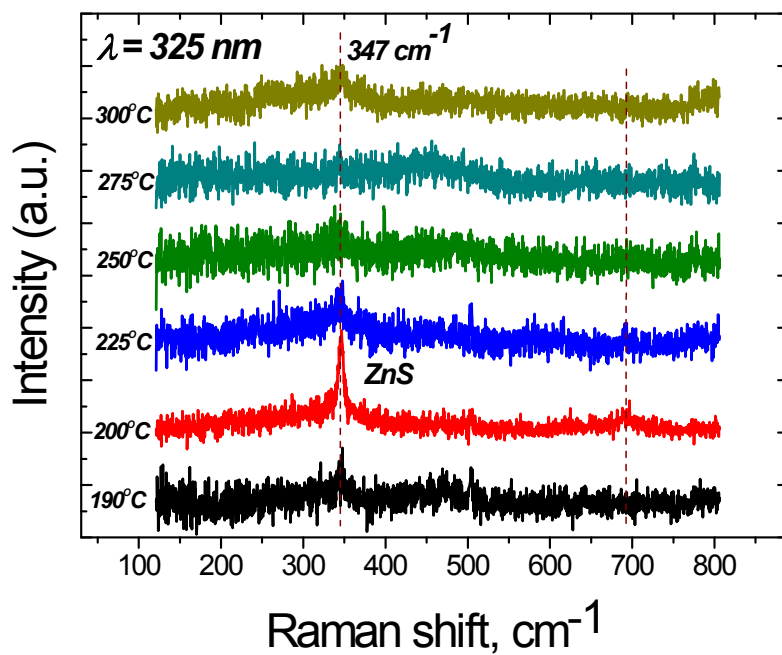

Fig. S5. Raman spectrum of nanocrystals synthesized at different injection temperatures measured with UV excitation laser ( $\lambda_{exc} = 325 \text{ nm}$ ).

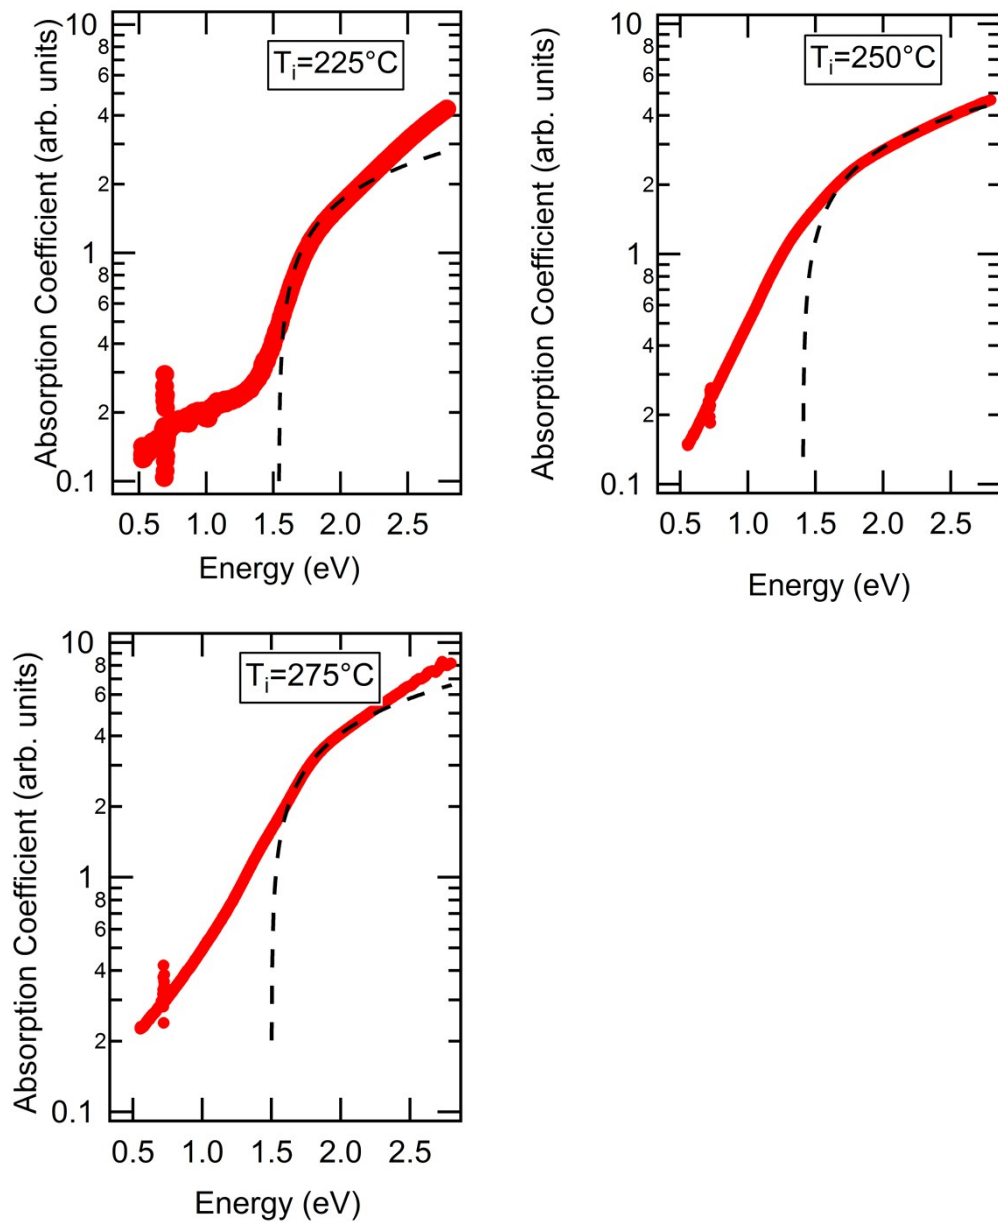

Fig. S6. Absorption coefficient of CZTS nanocrystals (red line) and fit absorption model  $\sim(E - E_g)^{0.5}$  (dashed line), where  $E$  – the photon energy and  $E_g$  – the band gap.

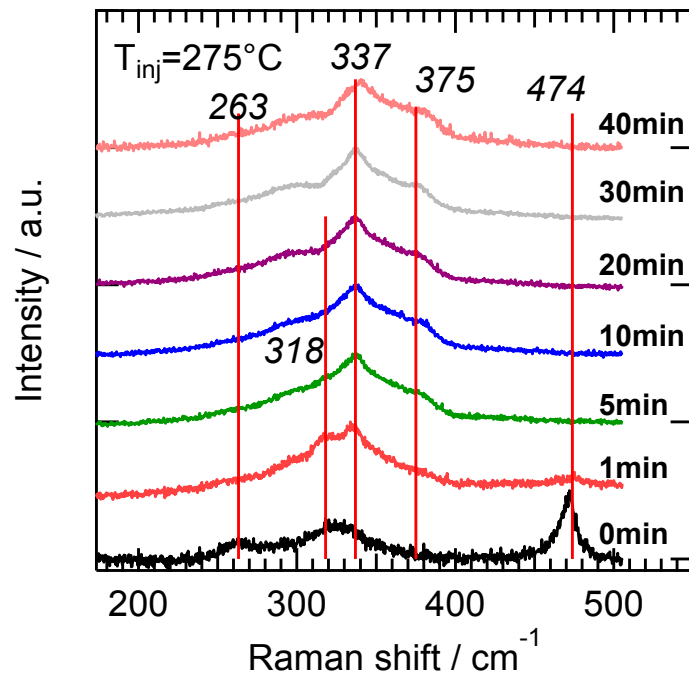

Fig. S7. Evolution of Raman signal of CZTS nanoparticles synthesized at  $275^{\circ}\text{C}$  with increasing of the growth time.
